# Supplementary material
Source: PubMed Central journal article supplement (PMC4135286)
Supplement: 97320630010401S1.pdf [file 97320630010401S1.pdf]

## Supplementary material:

**Table 1: A)** Nonessential and essential amino acids for humans and *Clostridium*, respectively. (\*) Essential only in certain cases, (\*\*) nonessential in certain cases; **B)** Putative glutamate specific component of ABC transporter in *C. perfringens*. This is based on the conservation of glutamate and aspartate transporter subunit (NCBI conserved domain PRK10797) in bacterial proteome.

| <b>A</b>                            |                                             |
|-------------------------------------|---------------------------------------------|
| Non-essential amino acids of humans | Essential amino acids of <i>Clostridium</i> |
| Alanine                             | Alanine**                                   |
| Arginine*                           | Arginine                                    |
| Aspartic acid                       | Aspartic acid**                             |
| Cysteine*                           | Cysteine**                                  |
| Glutamic acid                       | Glutamic acid                               |
| Glutamine*                          | Histidine                                   |
| Glycine*                            | Isoleucine**                                |
| Proline*                            | leucine                                     |
| Serine*                             | Methionine**                                |
| Tyrosine*                           | Tyrosine                                    |
| Asparagine*                         | Threonine                                   |
|                                     | Tryptophan                                  |
|                                     | Phenylalanine                               |
|                                     | Valine                                      |

  

| <b>B</b>                                |                                                               |
|-----------------------------------------|---------------------------------------------------------------|
| <i>Clostridium perfringens</i> Biotypes | Putative Gene/ORF for periplasmic glutamate binding protein * |
| Type A - SM101                          | <b>CPR_1324</b>                                               |
| Type A - ATCC 13124                     | <b>CPF_1531</b>                                               |
| Type A- Strain 13                       | <b>CPE_1324</b>                                               |
| Type A- F262                            | HA1_08167                                                     |
| WAL-14572                               | HMPREF9476_00976                                              |

**Table 2:** Predicted functional partners of the aligned consensus of putative proteins from *C. perfringens* type-A strains using STRING database search. The ABC-type amino acid transport/signal transduction systems, periplasmic component/domain (COG0834) was the input.

| COGs    | Functional partner                                                                            |
|---------|-----------------------------------------------------------------------------------------------|
| COG0765 | ABC-type amino acid transport system, permease component                                      |
| COG1126 | ABC-type polar amino acid transport system, ATPase component                                  |
| COG0642 | Signal transduction histidine kinase                                                          |
| COG0784 | FOG- CheY-like receiver                                                                       |
| COG4215 | ABC-type arginine transport system, permease component                                        |
| COG2199 | FOG- GGDEF domain                                                                             |
| COG2197 | Response regulator containing a CheY-like receiver domain and an HTH DNA-binding domain       |
| COG2202 | FOG- PAS/PAC domain                                                                           |
| COG0745 | Response regulators consisting of a CheY-like receiver and a winged-helix DNA-binding domain  |
| COG5001 | Predicted signal transduction protein containing a membrane domain, an EAL and a GGDEF domain |
